# Supplementary material
Source: Springer Nature journal article supplement (https://www.springermedizin.de/resource/supplementary/12880_2013_194_MOESM4_ESM.pdf/9450192)

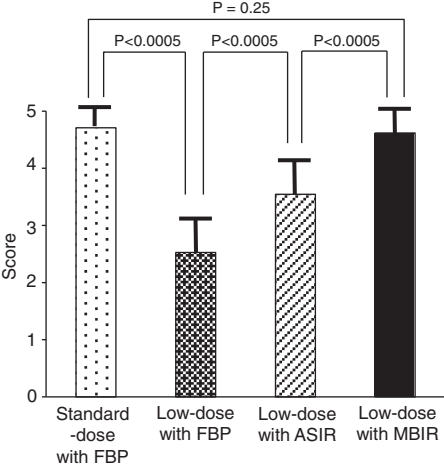

**Mediastinum**

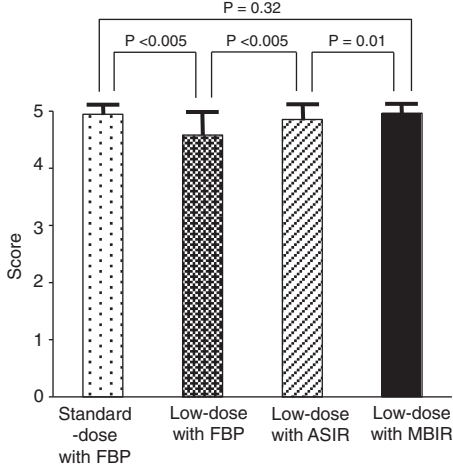

**Lung**

Supplement: MOESM4 [file 9450192]
